# Supplementary material
Source: MDPI journal article supplement (https://www.mdpi.com/2306-5338/6/4/94)
Supplement: s1 [file s1]

# Deterministic Methodology for Determining the Optimal Sampling Frequency of Water Quality Monitoring Systems

Mahmoud Saleh Al-Khafaji

Civil Engineering Department, University of Technology, Baghdad, Iraq

\* Correspondence: 41100@uotechnology.edu.iq; +9647801618485

## Supplementary Materials

Distribution patterns of turbidity, pH, DO, BOD, Ca<sup>2+</sup>, Mg<sup>2+</sup>, Na<sup>+</sup>, SO<sub>4</sub><sup>2-</sup>, PO<sub>4</sub><sup>3-</sup>, NO<sub>3</sub><sup>-</sup>, Cd, Cr and Pb for the cases 1, 15 and 30, respectively.

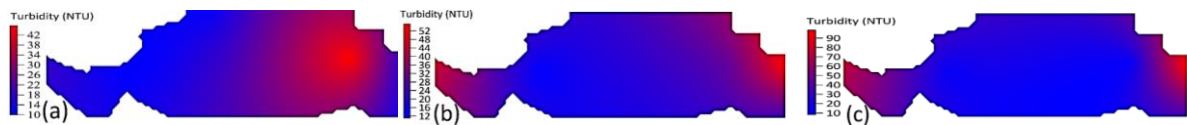

Figure S1. Distribution patterns of Turbidity; (a) Case 1, (b) Case 15, (C) Case 30.

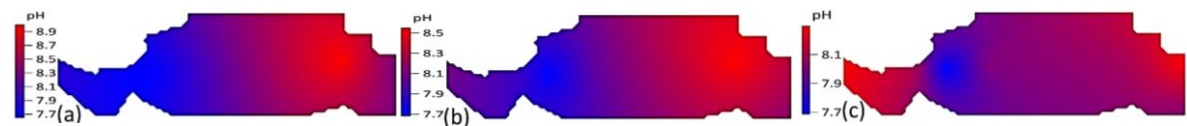

Figure S2. Distribution patterns of pH; (a) Case 1, (b) Case 15, (C) Case 30.

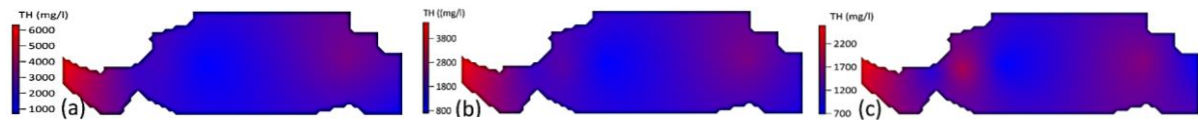

Figure S3. Distribution patterns of TH; (a) Case 1, (b) Case 15, (C) Case 30.

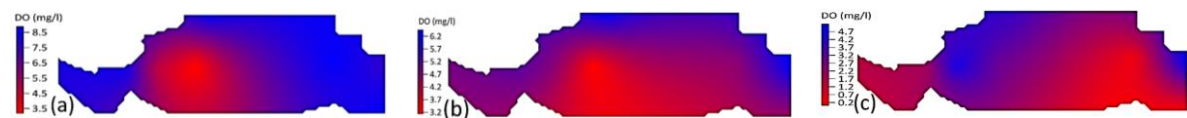

Figure S4. Distribution patterns of DO; (a) Case 1, (b) Case 15, (C) Case 30.

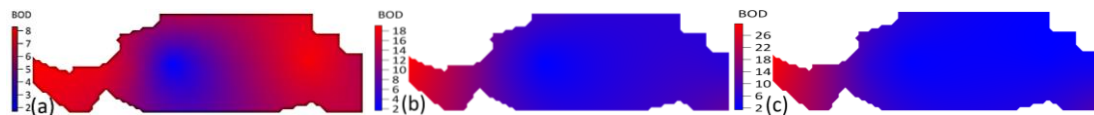

Figure S5. Distribution patterns of BOD; (a) Case 1, (b) Case 15, (C) Case 30.

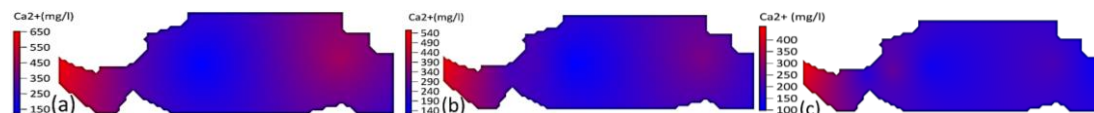

Figure S6. Distribution patterns of Ca<sup>2+</sup>; (a) Case 1, (b) Case 15, (C) Case 30.

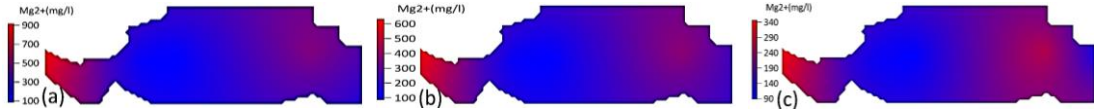

Figure S7. Distribution patterns of  $Mg^{2+}$ ; (a) Case 1, (b) Case 15, (C) Case 30.

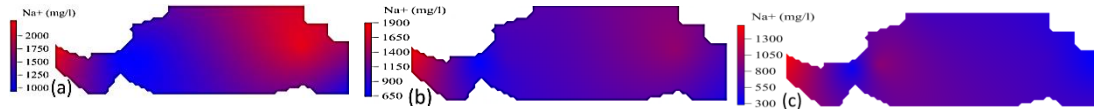

Figure S8. Distribution patterns of  $Na^{+}$ ; (a) Case 1, (b) Case 15, (C) Case 30.

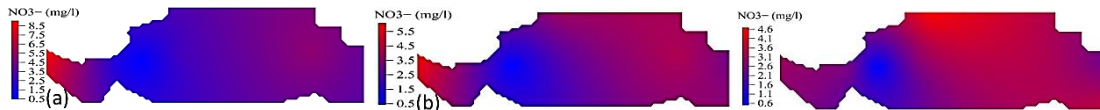

Figure S9. Distribution patterns of  $NO_3^{-}$ ; (a) Case 1, (b) Case 15, (C) Case 30.

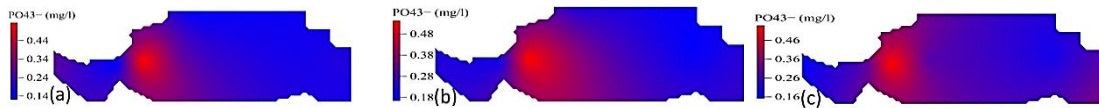

Figure S10. Distribution patterns of  $PO_4^{3-}$ ; (a) Case 1, (b) Case 15, (C) Case 30.

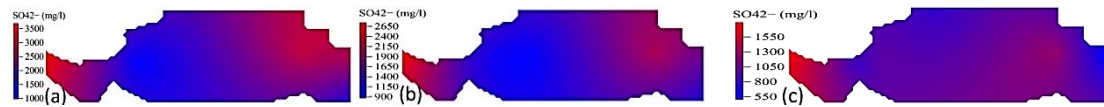

Figure S11. Distribution patterns of  $SO_4^{2-}$ ; (a) Case 1, (b) Case 15, (C) Case 30.

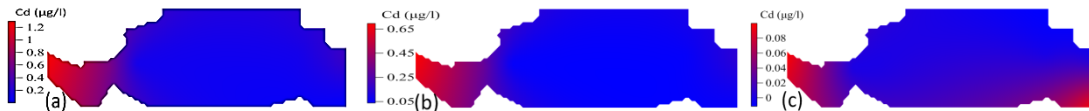

Figure S12. Distribution patterns of  $Cd$ ; (a) Case 1, (b) Case 15, (C) Case 30.

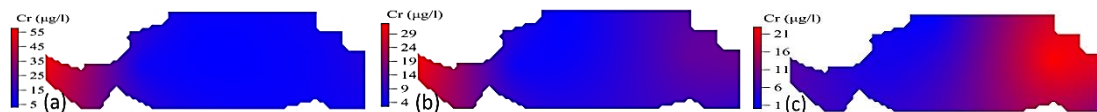

Figure S13. Distribution patterns of  $Cr$ ; (a) Case 1, (b) Case 15, (C) Case 30.

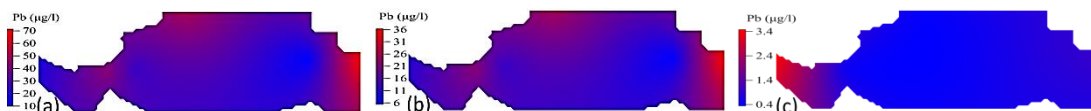

Figure S14. Distribution patterns of  $Pb$ ; (a) Case 1, (b) Case 15, (C) Case 30.
